# Supplementary material for: Activation volumes for cis-to-trans isomerisation reactions of azophenols: a clear mechanistic indicator?
Source: Royal Society of Chemistry journal article supplement (doi:10.1039/c7cp07349f), 2017-12-05
Supplement: c7cp07349f1.pdf [file c7cp07349f1.pdf]

**Electronic Supplementary Information**

**Activation volumes for *cis-to-trans* isomerisation reactions  
of azophenols. A clear mechanistic indicator?**

Jaume Garcia-Amorós,<sup>a</sup> Grzegorz Stopa,<sup>b</sup> Grazyna Stochel,<sup>b</sup> Rudi van Eldik,<sup>b,c\*</sup> Manuel Martínez<sup>d\*</sup> and Dolores Velasco<sup>a\*</sup>

<sup>a</sup> *Grup de Materials Orgànics, Institut de Nanociència i Nanotecnologia (IN<sup>2</sup>UB), Departament de Química Inorgànica i Orgànica (Secció de Química Orgànica), Universitat de Barcelona, Martí i Franquès 1, E-08028 Barcelona, Spain*

<sup>b</sup> *Faculty of Chemistry, Jagiellonian University, Gronostajowa 2, 30-387 Krakow, Poland*

<sup>c</sup> *Department of Chemistry and Pharmacy, University of Erlangen-Nuremberg, Egerlandstr. 1, 91058 Erlangen, Germany*

<sup>d</sup> *Departament de Química Inorgànica i Orgànica (Secció de Química Inorgànica), Facultat de Química, Universitat de Barcelona, Martí i Franquès 1, E-08028 Barcelona, Spain*

**Table S1.** First order rate constants at 298 K obtained for the azo derivatives **3-7** as a function of solvent and pressure. The concentration of the azo derivative is  $1 \times 10^{-5}$  M in all cases (unless otherwise stated).

| <b>Compound</b> | <b>Solvent</b> | <b><i>P</i> / atm</b> | <b><i>k</i> / s<sup>-1</sup></b> |
|-----------------|----------------|-----------------------|----------------------------------|
| <b>3</b>        | EtOH           | 50                    | 4.9                              |
|                 |                | 300                   | 4.7                              |
|                 |                | 600                   | 4.4                              |
|                 |                | 900                   | 4.1                              |
|                 |                | 1200                  | 4.1                              |
|                 |                | 1500                  | 4.0                              |
|                 | MeOH           | 50                    | 7.3                              |
|                 |                | 300                   | 7.0                              |
|                 |                | 600                   | 6.7                              |
|                 |                | 900                   | 6.1                              |
|                 |                | 1200                  | 6.0                              |
|                 |                | 1500                  | 6.1                              |
|                 | MeCN           | 50                    | 1.8                              |
|                 |                | 300                   | 1.9                              |
|                 |                | 600                   | 1.9                              |
|                 |                | 900                   | 2.1                              |
|                 |                | 1200                  | 2.0                              |
|                 |                | 1500                  | 2.1                              |
|                 | MePh           | 300                   | $7.5 \times 10^{-4}$             |
|                 |                | 600                   | $6.6 \times 10^{-4}$             |
|                 |                | 900                   | $6.9 \times 10^{-4}$             |
| 1200            |                | $6.7 \times 10^{-4}$  |                                  |
| 1500            |                | $6.8 \times 10^{-4}$  |                                  |

| <b>Compound</b> | <b>Solvent</b> | <b><i>P</i> / atm</b> | <b><i>k</i> / s<sup>-1</sup></b> |
|-----------------|----------------|-----------------------|----------------------------------|
| <b>4</b>        | EtOH           | 50                    | $9.5 \times 10^1$                |
|                 |                | 300                   | $8.4 \times 10^1$                |
|                 |                | 600                   | $6.7 \times 10^1$                |
|                 |                | 900                   | $5.5 \times 10^1$                |
|                 |                | 1200                  | $4.9 \times 10^1$                |
|                 |                | 1500                  | $4.1 \times 10^1$                |
|                 | MeCN           | 50                    | 5.3                              |
|                 |                | 300                   | 5.3                              |
|                 |                | 600                   | 6.8                              |
|                 |                | 900                   | 7.7                              |
|                 |                | 1200                  | 8.2                              |
|                 |                | 1500                  | 9.3                              |
|                 | MePh           | 300                   | $1.0 \times 10^{-3}$             |
|                 |                | 600                   | $8.0 \times 10^{-4}$             |
|                 |                | 900                   | $1.2 \times 10^{-3}$             |
|                 |                | 1200                  | $1.1 \times 10^{-3}$             |
|                 |                | 1500                  | $9.7 \times 10^{-4}$             |

| <b>Compound</b> | <b>Solvent</b> | <b><i>P</i> / atm</b> | <b><i>k</i> / s<sup>-1</sup></b> |
|-----------------|----------------|-----------------------|----------------------------------|
| <b>5</b>        | EtOH           | 50                    | $6.6 \times 10^1$                |
|                 |                | 300                   | $5.6 \times 10^1$                |
|                 |                | 600                   | $5.1 \times 10^1$                |
|                 |                | 900                   | $4.0 \times 10^1$                |
|                 |                | 1200                  | $3.5 \times 10^1$                |
|                 |                | 1500                  | $3.1 \times 10^1$                |
|                 | MeOH           | 50                    | $3.9 \times 10^2$                |
|                 |                | 300                   | $3.4 \times 10^2$                |
|                 |                | 600                   | $2.9 \times 10^2$                |
|                 |                | 900                   | $2.6 \times 10^2$                |
|                 |                | 1200                  | $2.5 \times 10^2$                |
|                 |                | 1500                  | $2.2 \times 10^2$                |
|                 | MeCN           | 50                    | 5.2                              |
|                 |                | 300                   | 9.0                              |
|                 |                | 600                   | $1.0 \times 10^1$                |
|                 |                | 900                   | 9.4                              |
|                 |                | 1200                  | $1.3 \times 10^1$                |
|                 |                | 1500                  | $1.7 \times 10^1$                |
|                 | MePh           | 300                   | $1.6 \times 10^{-3}$             |
|                 |                | 600                   | $1.5 \times 10^{-3}$             |
|                 |                | 900                   | $1.5 \times 10^{-3}$             |
| 1200            |                | $1.5 \times 10^{-3}$  |                                  |
| 1500            |                | $1.4 \times 10^{-3}$  |                                  |

| <b>Compound</b> | <b>Solvent</b> | <b><i>P</i> / atm</b> | <b><i>k</i> / s<sup>-1</sup></b> |
|-----------------|----------------|-----------------------|----------------------------------|
| <b>6</b>        | EtOH           | 50                    | $2.4 \times 10^2$                |
|                 |                | 300                   | $2.7 \times 10^2$                |
|                 |                | 600                   | $3.1 \times 10^2$                |
|                 |                | 900                   | $3.5 \times 10^2$                |
|                 |                | 1200                  | $3.8 \times 10^2$                |
|                 |                | 1500                  | $4.8 \times 10^2$                |
|                 | MeCN           | 50                    | $1.9 \times 10^1$                |
|                 |                | 300                   | $2.1 \times 10^1$                |
|                 |                | 600                   | $2.2 \times 10^1$                |
|                 |                | 900                   | $2.5 \times 10^1$                |
|                 |                | 1200                  | $2.9 \times 10^1$                |
|                 |                | 1500                  | $2.9 \times 10^1$                |
|                 | MePh           | 50                    | 7.4                              |
|                 |                | 300                   | 7.8                              |
|                 |                | 600                   | 8.2                              |
|                 |                | 900                   | 9.9                              |
|                 |                | 1200                  | 8.5                              |
|                 |                | 1500                  | 8.1                              |

| <b>Compound</b> | <b>Solvent</b> | <b><i>P</i> / atm</b> | <b><i>k</i> / s<sup>-1</sup></b> |
|-----------------|----------------|-----------------------|----------------------------------|
| <b>7</b>        | EtOH           | 300                   | $1.5 \times 10^1$                |
|                 |                | 600                   | $1.8 \times 10^1$                |
|                 |                | 900                   | $2.0 \times 10^1$                |
|                 |                | 1200                  | $2.0 \times 10^1$                |
|                 |                | 1500                  | $2.2 \times 10^1$                |
|                 | MeCN           | 50                    | 5.0                              |
|                 |                | 300                   | 5.4                              |
|                 |                | 900                   | 6.2                              |
|                 |                | 1200                  | 6.5                              |
|                 |                | 1500                  | 7.3                              |
|                 | MePh           | 50                    | 2.6                              |
|                 |                | 300                   | 2.9                              |
|                 |                | 600                   | 2.7                              |
|                 |                | 900                   | 3.1                              |
|                 |                | 1200                  | 2.5                              |
|                 |                | 1500                  | 2.9                              |
